# Supplementary material for: Hsa-miR-19a is associated with lymph metastasis and mediates the TNF-α induced epithelial-to-mesenchymal transition in colorectal cancer
Source: PubMed Central journal article supplement (PMC5388049; doi:10.1038/srep13350), 2015-08-25

**Hsa-miR-19a is associated with lymph metastasis and mediates the TNF- $\alpha$  induced epithelial-to-mesenchymal transition in colorectal cancer**

Lanlan Huang<sup>1, 2, 3, 4</sup>, Xiaoyan Wang<sup>1, 2, 3, 4</sup>, Chuangyu Wen<sup>1, 2, 3, 4</sup>, Xiangling Yang<sup>1, 2, 3, 4</sup>, Minmin Song<sup>1, 2, 3, 4</sup>, Junxiong Chen<sup>1, 2, 3, 4</sup>, Chenliang Wang<sup>1, 2, 3, 4</sup>, Bo Zhang<sup>1, 2</sup>, Lei Wang<sup>1, 2</sup>, Aikichi Iwamoto<sup>5</sup>, Jianping Wang<sup>1, 2\*</sup>, Huanliang Liu<sup>1, 2, 3, 4\*</sup>

<sup>1</sup>Guangdong Institute of Gastroenterology and the Sixth Affiliated Hospital, <sup>2</sup>Guangdong Key Laboratory of Colorectal and Pelvic Floor Diseases, <sup>3</sup>Institute of Human Virology, <sup>4</sup>Key Laboratory of Tropical Disease Control (Ministry of Education), Sun Yat-sen University, Guangzhou, China, <sup>5</sup>Advanced Clinical Research Center, Institute of Medical Science, University of Tokyo, Tokyo, Japan

**Corresponding author:**

Huanliang Liu. 26 Yuancun Er heng Road, Guangzhou, Guangdong 510655, China. TEL: +86-20-38455492; E-mail address: [liuhuanl@mail.sysu.edu.cn](mailto:liuhuanl@mail.sysu.edu.cn); [huanliang.liu@gmail.com](mailto:huanliang.liu@gmail.com)

Jianping Wang. 26 Yuancun Er heng Road, Guangzhou, Guangdong 510655, China. TEL: +86-20-38254419; E-mail address: [wangjpgz@yahoo.com.cn](mailto:wangjpgz@yahoo.com.cn)

## Supplementary Materials

Table S1. Clinical and histopathological information of the 11 cases of CRC.

| Case no. | Gender (M/F) | Age (years) | Location         | Lymph node invasion | distant metastasis | TNM stage |
|----------|--------------|-------------|------------------|---------------------|--------------------|-----------|
| 1        | F            | 70          | Sigmoid colon    | Yes                 | No                 | III       |
| 2        | F            | 37          | Transverse colon | No                  | No                 | II        |
| 3        | F            | 73          | Rectum           | No                  | No                 | II        |
| 4        | F            | 75          | Rectum           | Yes                 | No                 | III       |
| 5        | M            | 65          | Sigmoid colon    | Yes                 | No                 | III       |
| 6        | F            | 79          | Right colon      | No                  | No                 | II        |
| 7        | M            | 59          | Sigmoid colon    | Yes                 | No                 | III       |
| 8        | M            | 52          | Rectum           | Yes                 | No                 | III       |
| 9        | M            | 85          | Right colon      | No                  | No                 | II        |
| 10       | M            | 51          | Left colon       | Yes                 | No                 | III       |
| 11       | F            | 85          | Sigmoid colon    | Yes                 | No                 | III       |

M, male; F, female.

Table S2. Patient demographic and clinical characteristics of 275 CRC patients.

| <b>Characteristics</b>          | <b>of cases</b> |
|---------------------------------|-----------------|
| <b>Age (years)</b>              |                 |
| <60                             | 142 (51.64%)    |
| ≥60                             | 133 (48.36%)    |
| <b>Gender</b>                   |                 |
| Male                            | 152 (55.27%)    |
| Female                          | 123 (44.73%)    |
| <b>Tumor size</b>               |                 |
| <5cm                            | 139 (50.55%)    |
| ≥5cm                            | 136 (49.45%)    |
| <b>Tumor location</b>           |                 |
| Colon                           | 132 (48%)       |
| Rectum                          | 142 (51.64%)    |
| Missing data                    | 1 (0.36%)       |
| <b>Differentiation</b>          |                 |
| Well                            | 21 (7.64%)      |
| Moderate                        | 219 (79.64%)    |
| Poor                            | 31 (11.27%)     |
| Undifferentiation               | 1 (0.36%)       |
| Missing data                    | 2 (0.73%)       |
| <b>Primary tumor (pT)</b>       |                 |
| T1                              | 6 (2.18%)       |
| T2                              | 52 (18.91%)     |
| T3                              | 198 (72%)       |
| T4                              | 19 (6.91%)      |
| <b>Regional lymph node (pN)</b> |                 |
| N0                              | 156 (56.73%)    |
| N1                              | 77 (28%)        |
| N2                              | 35 (12.8%)      |
| Missing data                    | 7 (2.5%)        |
| <b>Distant Metastasis (pM)</b>  |                 |
| M0                              | 250 (90.91%)    |
| M1                              | 25 (9.09%)      |
| <b>TNM stage</b>                |                 |
| I                               | 49 (17.82%)     |
| II                              | 99 (36%)        |
| III                             | 102 (37.09%)    |
| IV                              | 25 (9.09%)      |
| <b>Relapse</b>                  |                 |
| Yes                             | 38 (13.82%)     |
| No                              | 233 (84.73%)    |
| Missing data                    | 4 (1.45%)       |

Table S3. Patient demographic and clinical characteristics of 218 colon cancer patients.

| <b>Characteristics</b>          | <b>of cases</b> |
|---------------------------------|-----------------|
| <b>Age (years)</b>              |                 |
| <60                             | 65 (29.8%)      |
| ≥60                             | 153 (70.2%)     |
| <b>Gender</b>                   |                 |
| Male                            | 124 (56.9%)     |
| Female                          | 94 (43.1%)      |
| <b>TNM stage</b>                |                 |
| I                               | 31 (14.2%)      |
| II                              | 89 (40.8%)      |
| III                             | 64 (29.4%)      |
| IV                              | 26 (11.9%)      |
| Missing data                    | 8 (3.7%)        |
| <b>Primary tumor (pT)</b>       |                 |
| TX                              | 1 (0.5%)        |
| T1                              | 5 (2.3%)        |
| T2                              | 31 (14.2%)      |
| T3                              | 156 (71.6%)     |
| T4                              | 25 (11.5%)      |
| <b>Regional lymph node (pN)</b> |                 |
| NX                              | 1 (0.5%)        |
| N0                              | 128 (58.7%)     |
| N1                              | 53 (24.3%)      |
| N2                              | 36 (16.5%)      |
| <b>Distant Metastasis (pM)</b>  |                 |
| MX                              | 36 (16.5%)      |
| M0                              | 152 (69.7%)     |
| M1                              | 26 (11.9%)      |
| Missing data                    | 4 (1.8%)        |

Table S4. Patient demographic and clinical characteristics of 93 rectal cancer patients.

| <b>Characteristics</b>          | <b>of cases</b> |
|---------------------------------|-----------------|
| <b>Age (years)</b>              |                 |
| <60                             | 37 (39.8%)      |
| ≥60                             | 56 (60.2%)      |
| <b>Gender</b>                   |                 |
| Male                            | 50 (53.8%)      |
| Female                          | 43 (46.2%)      |
| Missing data                    | 78 (83.9%)      |
| <b>TNM stage</b>                |                 |
| I                               | 13 (14.0%)      |
| II                              | 25 (26.9%)      |
| III                             | 34 (36.6%)      |
| IV                              | 16 (17.2%)      |
| Missing data                    | 5 (5.4%)        |
| <b>Primary tumor (pT)</b>       |                 |
| T1                              | 5 (5.4%)        |
| T2                              | 14 (15.1%)      |
| T3                              | 63 (67.7%)      |
| T4                              | 10 (10.7%)      |
| Missing data                    | 1 (1.1%)        |
| <b>Regional lymph node (pN)</b> |                 |
| NX                              | 2 (2.2%)        |
| N0                              | 40 (43.0%)      |
| N1                              | 29 (31.2%)      |
| N2                              | 21 (22.6%)      |
| Missing data                    | 1 (1.1%)        |
| <b>Distant Metastasis (pM)</b>  |                 |
| MX                              | 14 (15.1%)      |
| M0                              | 64 (68.8%)      |
| M1                              | 13 (14.0%)      |
| Missing data                    | 2 (2.2%)        |

Table S5. Correlation between miR-19a expression and clinical parameters in 218 colon cancer patients.

| <b>Factors</b>   | <b>n</b> | <b>Low miR-19a<br/>expression (%)</b> | <b>High miR-19a<br/>expression (%)</b> | <b>P - value</b> |
|------------------|----------|---------------------------------------|----------------------------------------|------------------|
| <b>Age</b>       |          |                                       |                                        | 0.104            |
| <60              | 65       | 47 (72.3)                             | 18 (27.7)                              |                  |
| ≥60              | 153      | 93 (60.8)                             | 60 (39.2)                              |                  |
| <b>Gender</b>    |          |                                       |                                        | 0.108            |
| Male             | 124      | 74 (59.7)                             | 50 (40.3)                              |                  |
| Female           | 94       | 66 (70.2)                             | 28 (29.8)                              |                  |
| <b>TNM stage</b> |          |                                       |                                        | 0.299            |
| I                | 31       | 21 (67.7)                             | 10 (32.3)                              |                  |
| II               | 89       | 54 (60.7)                             | 35 (39.3)                              |                  |
| III              | 64       | 42 (65.6)                             | 22 (34.4)                              |                  |
| IV               | 26       | 21 (80.8)                             | 5 (19.2)                               |                  |
| <b>pT</b>        |          |                                       |                                        | 0.433            |
| T1+T2            | 36       | 21 (58.3)                             | 15 (41.7)                              |                  |
| T3+T4            | 181      | 118 (65.3)                            | 63 (34.8)                              |                  |
| <b>pN</b>        |          |                                       |                                        | 0.302            |
| N0               | 128      | 79 (61.7)                             | 49 (38.3)                              |                  |
| N1+N2            | 89       | 61 (68.5)                             | 28 (31.5)                              |                  |
| <b>pM</b>        |          |                                       |                                        | 0.062            |
| M0               | 152      | 94 (61.8)                             | 58 (38.2)                              |                  |
| M1               | 26       | 21 (80.8)                             | 5 (19.2)                               |                  |

Table S6. Correlation between miR-19a expression and clinical parameters in 93 rectal cancer patients.

| <b>Factors</b>   | <b>n</b> | <b>Low miR-19a<br/>expression (%)</b> | <b>High miR-19a<br/>expression (%)</b> | <b>P - value</b> |
|------------------|----------|---------------------------------------|----------------------------------------|------------------|
| <b>Age</b>       |          |                                       |                                        | 0.638            |
| <60              | 37       | 16 (43.2)                             | 21 (56.8)                              |                  |
| ≥60              | 56       | 27 (48.2)                             | 29 (51.8)                              |                  |
| <b>Gender</b>    |          |                                       |                                        | 0.086            |
| Male             | 50       | 19 (38.0)                             | 31 (62.0)                              |                  |
| Female           | 43       | 24 (55.8)                             | 19 (44.2)                              |                  |
| <b>TNM stage</b> |          |                                       |                                        | 0.104            |
| I                | 13       | 7 (53.8)                              | 6 (46.2)                               |                  |
| II               | 25       | 15 (60.0)                             | 10 (40.0)                              |                  |
| III              | 34       | 10 (29.4)                             | 24 (70.6)                              |                  |
| IV               | 16       | 8 (50.0)                              | 8 (50.0)                               |                  |
| <b>pT</b>        |          |                                       |                                        | 0.728            |
| T1+T2            | 19       | 8 (42.1)                              | 11 (57.9)                              |                  |
| T3+T4            | 73       | 34 (46.6)                             | 39 (53.4)                              |                  |
| <b>pN</b>        |          |                                       |                                        | 0.004            |
| N0               | 40       | 25 (62.5)                             | 15 (37.5)                              |                  |
| N1+N2            | 50       | 16 (32.0)                             | 34 (68.0)                              |                  |
| <b>pM</b>        |          |                                       |                                        | 0.579            |
| M0               | 64       | 30 (46.9)                             | 34 (53.1)                              |                  |
| M1               | 13       | 5 (38.5)                              | 8 (61.5)                               |                  |

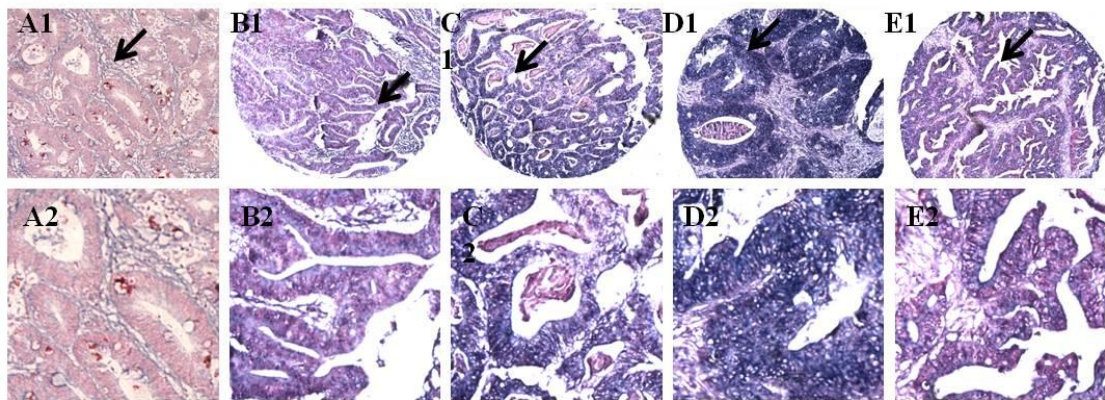

**Fig. S1** Expression of miR-19a in CRC using *in situ* hybridisation analysis.

Tissue sections were incubated with DIG-labelled LNA probe to miR-19a. The positive staining of tissue was expressed as blue-violet. No *in situ* hybridization signal was obtained in the absence of DIG-labeled probe (A1, A2). Weak staining of miR-19a was detected in stage I (B1, B2) and IV (E1, E2), stage II moderately positive expression of miR-19a (C1, C2), stage III strongly positive expression of miR-19a (D1, D2).



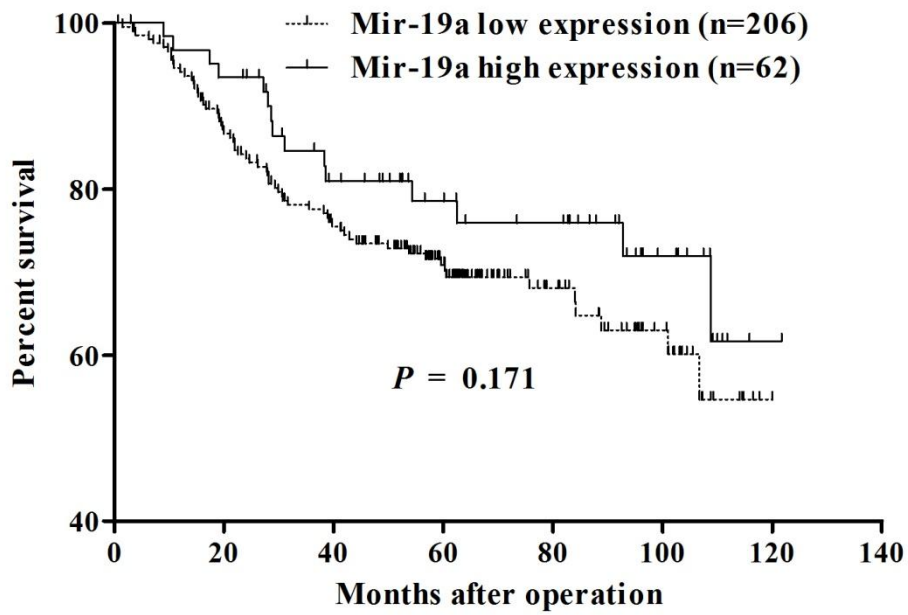

**Fig. S2 Association between miR-19a expression in colorectal cancer and overall survival in 268 CRC patients.**

In situ hybridization from paraffin blocks of CRC specimens followed by analysis of miR-19a levels. The Kaplan-Meier curve and log-rank test showed that miR-19a expression wasn't associated with survival ( $P = 0.171$ ).

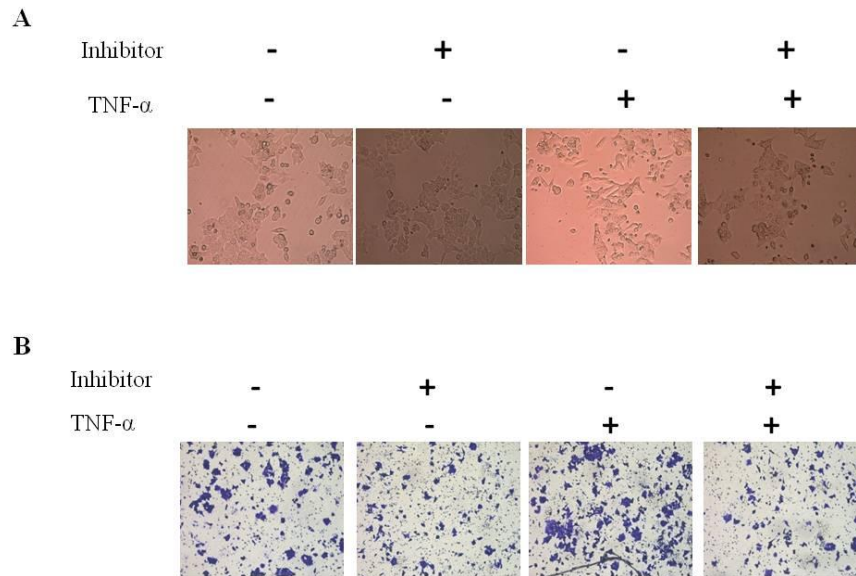

**Fig. S3 MiR-19 inhibitor reversed the TNF- $\alpha$  induced EMT transition.**

(A) The HCT 116 cells transfected either miR-19a inhibitor or negative control were treated with or without TNF- $\alpha$ . Cell morphology was examined and photographed.

(B) The HCT 116 cells transfected either miR-19a inhibitor or negative control with or without TNF- $\alpha$  were subjected to invasion assays. The HCT 116 cells transfected with miR-19a inhibitor reversed TNF- $\alpha$  effect on cell invasion.

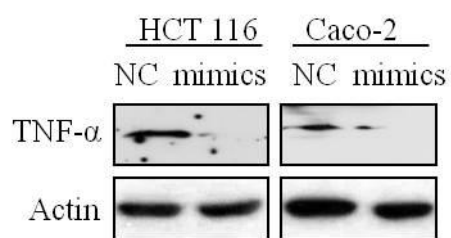

**Fig. S4 miR-19a down-regulated the expression of TNF- $\alpha$ .**

HCT 116 and Caco-2 cells were transfected with miR-19a mimics or negative control. Western blot analysis showed that miR-19a down-regulated the expression of TNF- $\alpha$ .

**Supplementary information**

Full-length blots:

Figure S4 A

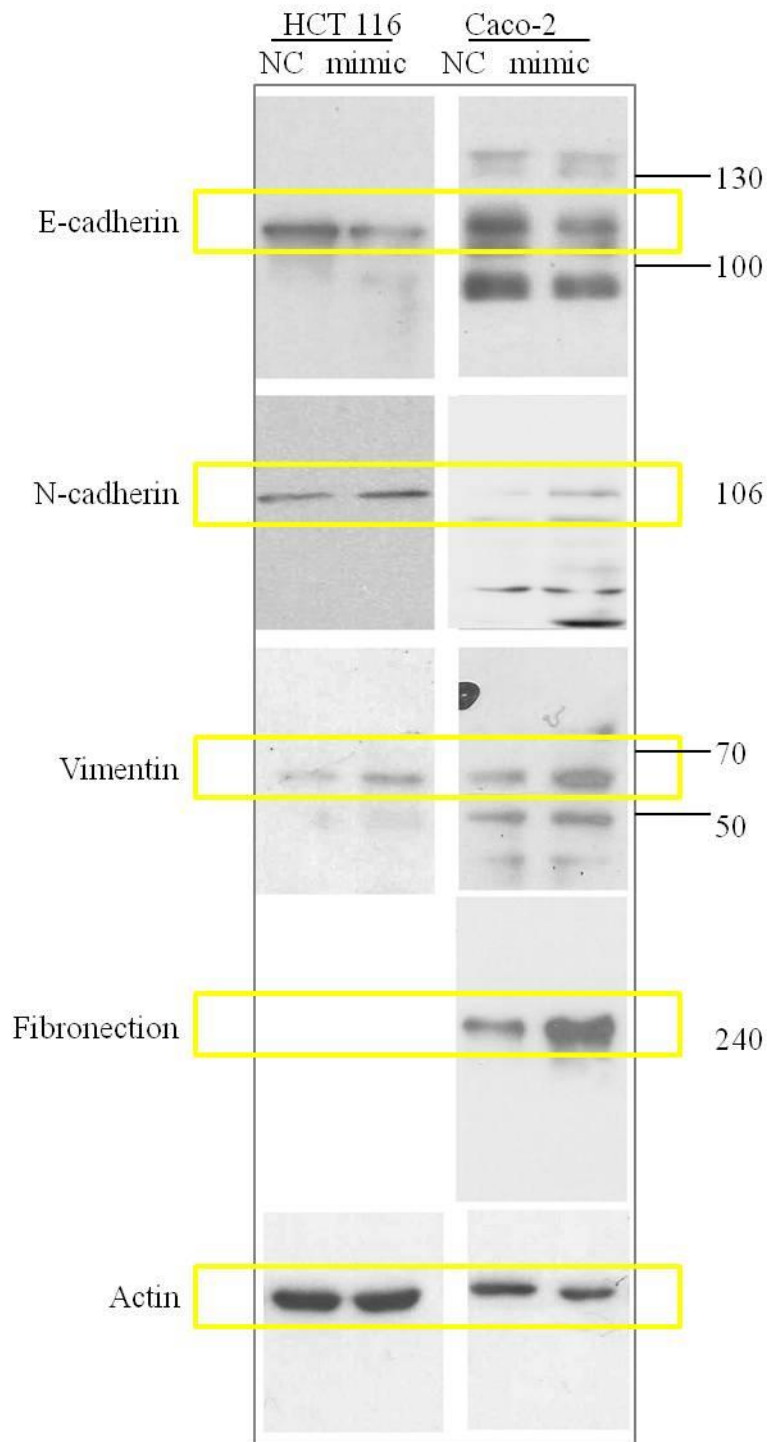

Figure S4 C

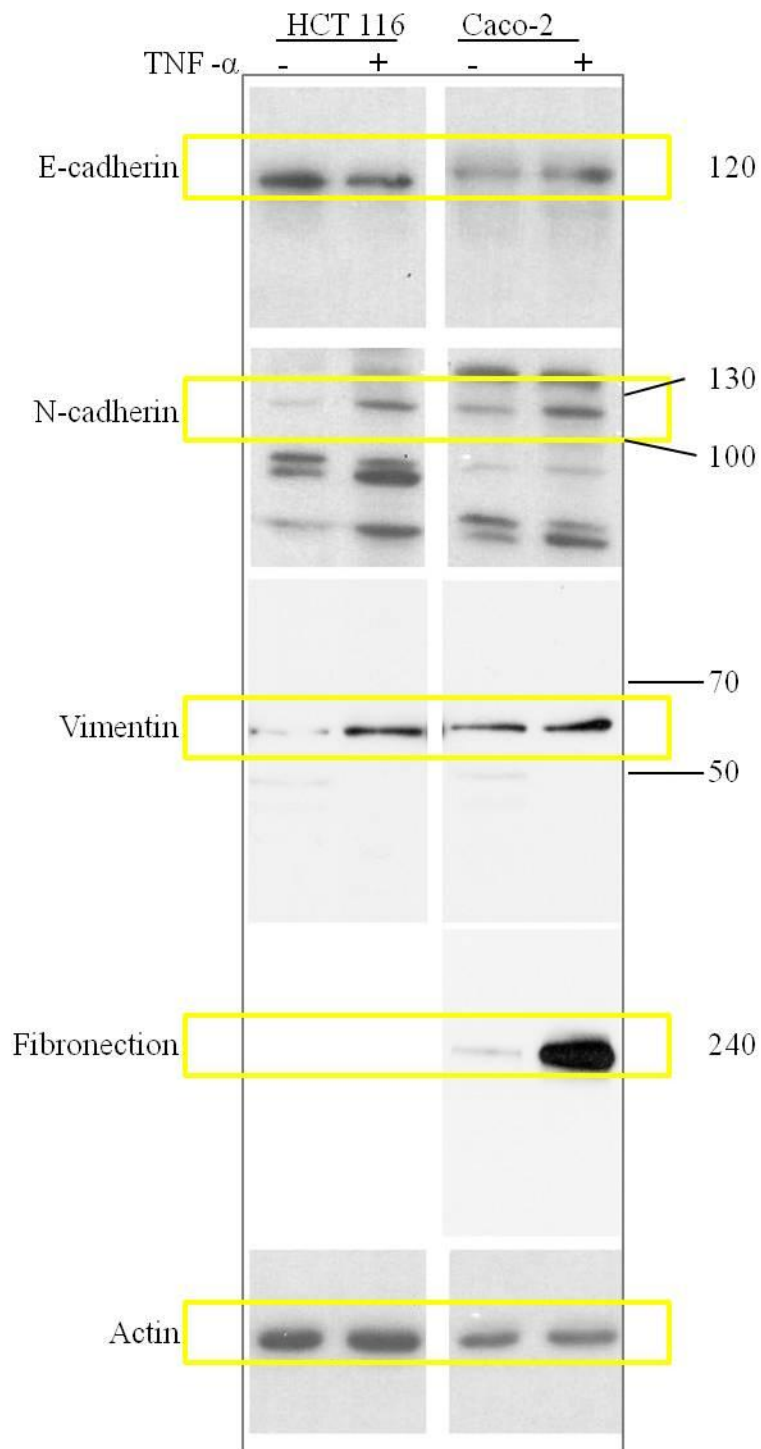

Figure S5

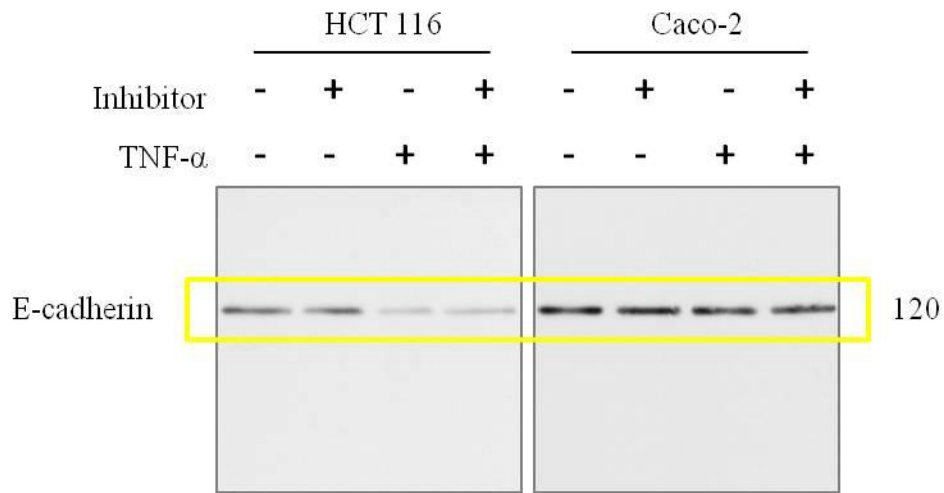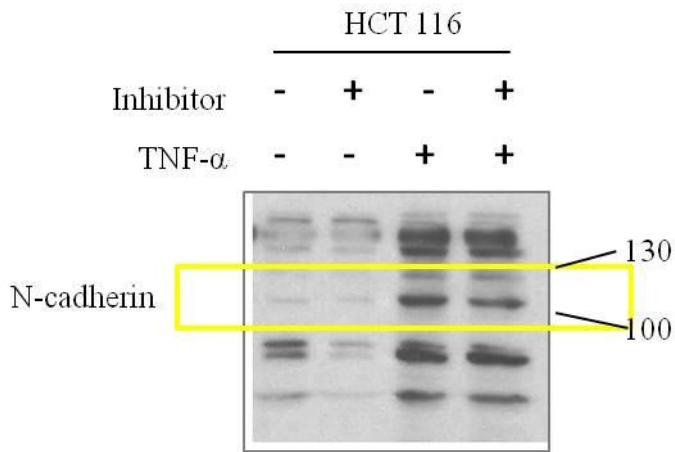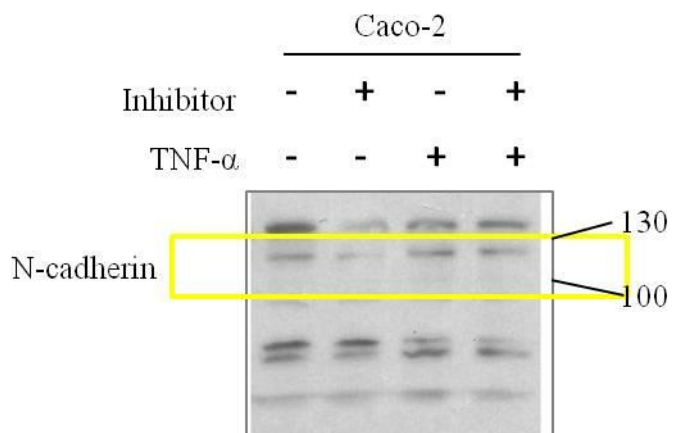

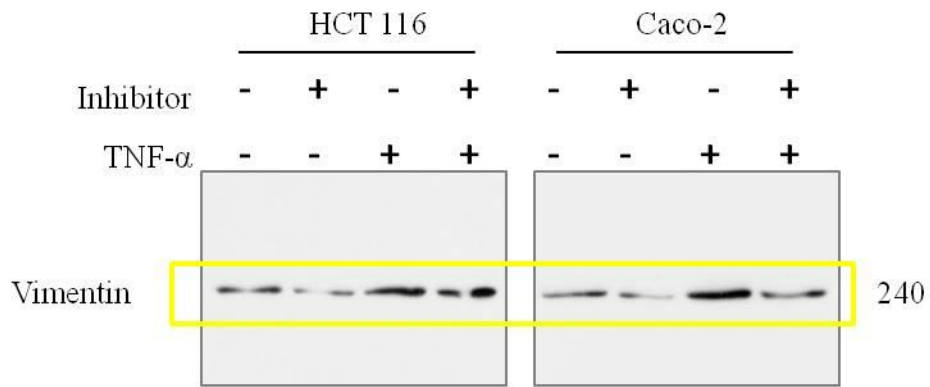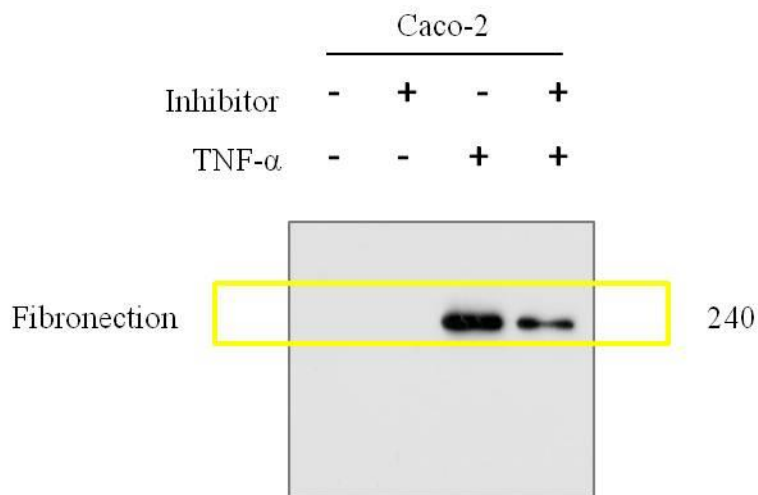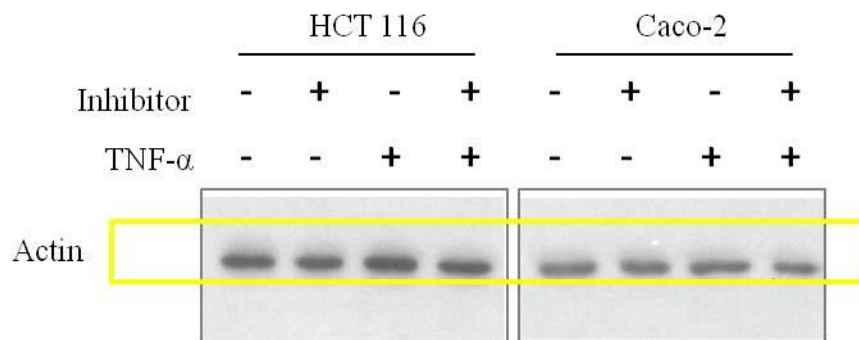

Supplement: srep13350-s1.pdf [file srep13350-s1.pdf]
